# Supplementary material for: Automated GNSS and Teleseismic Earthquake Inversion (AutoQuake Inversion) for Tsunami Early Warning: Retrospective and Real-Time Results
Source: Springer Nature journal article supplement (doi:10.1007/s00024-019-02252-x), 2019-06-18
Supplement: MOESM1 [file 24_2019_2252_MOESM1_ESM.docx]

## Supporting information for

## Automated GNSS and teleseismic earthquake inversion (AutoQuake Inversion) for tsunami early warning: respective and real-time results

Kejie Chen1, Zhen Liu2, Y. Tony Song2

1 ﻿Division of Geological and Planetary Sciences, California Institute of Technology, Pasadena, CA, 91125, USA

2 Jet Propulsion Laboratory, California Institute of Technology, Pasadena, CA, 91109, USA

Figure S1. ﻿Location of Mw>=5.0 earthquakes in the Global Centroid Moment Tensor (GCMT) catalogue, January 1976 to December 2012. Earthquake focal mechanisms are presented by lower focal hemisphere projection.

Figure S2. Teleseismic station distribution (left) and waveform fits (right) for 2015 Mw 8.3 Illapel earthquake. Blue star represents epicenter, recorded P wave displacement waves are in black and synthetics are in red, maximum amplitude for each waveform with unit as 10-6 m is indicated at right.

Figure S3. a)Teleseismic station distribution and data fits b) for 2016 Mw 7.8 Solomon Island earthquake using Slab2 fault geometry. c) Slip distribution inverted from teleseismic waveforms based on GCMT fault geometry and d) the corresponding P wave displacement waveform data fits. Blue star represents epicenter, recorded P wave displacement waves are in black and synthetics are in red, maximum amplitude for each waveform with unit as 10-6 m is indicated at right.
